# Supplementary material for: Calcification intensity in planktonic Foraminifera reflects ambient conditions irrespective of environmental stress
Source: Copernicus journal article supplement (doi:10.5194/bg-10-6639-2013), 2013-10-23
Supplement: Supplementary file 1 [file TableS1.xls]

## Sheet: Tabelle1
Authors:	Weinkauf, M. F. G., Moller, T., Koch, M. C., Kučera, M.
Publication:	Calcification intensity in planktonic Foraminifera reflects ambient conditions irrespective of environmental stress; Biogeosciences
Material:	Onset of Sapropel S5 in core M51-3/SL104, Eastern Mediterranean Sea (Pliny Trench)
Data:	Environmental and sampling data for whole core, including mean area density (MAD) of all four species of planktonic Foraminifera investigated
Parameters:
	Name	Short name				Unit							Comment
	Sample	Sample											Half values where two samples has been combined for weight measurements
	Depth	Depth				cm below coretop
	Age	Relative age				yrs							Age relative to the onset of Sapropel S5
	d18ORub	δ18Oruber				per mille
	d13CRub	δ13Cruber				per mille
	Asplit	Abundance split											Split used for abundance reconstruction, if two number divided by comma, the first one is for fraction 150-250μm, the second for fraction >250μm
	RelAbund	Relative abundance				per cent
	Accum	Accumulation rate				specimens/m2/year
	WSplit	Weights split											Split used for MAD determination
	WFraction	Weighing size fraction				μm							Sieve fraction used for weighing
	WN	Weighing N											Number of specimens for weighing in sample
	MAD	Mean area density				1e-4μg/μm2 for O. universa and G. inflata, 1e-5μg/μm2 for G. ruber (pink) and G. scitula
	CIL	Lower 95% confidence interval of MAD				1e-4μg/μm2 for O. universa and G. inflata, 1e-5μg/μm2 for G. ruber (pink) and G. scitula
	CIU	Upper 95% confidence interval of MAD				1e-4μg/μm2 for O. universa and G. inflata, 1e-5μg/μm2 for G. ruber (pink) and G. scitula
Sample	Depth	Age	d18Rub	d13CRub	Asplit	RelAbund_Universa	Accum_Universa	WSplit_Universa	WFraction_Universa	WN_Universa	MAD_Universa	CIL_Universa	CIU_Universa	RelAbund_Ruber	Accum_Ruber	WSplit_Ruber	WFraction_Ruber	WN_Ruber	MAD_Ruber	CIL_Ruber	CIU_Ruber	RelAbund_Scitula	Accum_Scitula	WSplit_Scitula	WFraction_Scitula	WN_Scitula	MAD_Scitula	CIL_Scitula	CIU_Scitula	RelAbund_Inflata	Accum_Inflata	WSplit_Inflata	WFraction_Inflata	WN_Inflata	MAD_Inflata	CIL_Inflata	CIU_Inflata
79	431.8	2072.87	-0.484	-0.596	2	0	0							0.234192	668.338							9.13349	26065.2							0	0
78.5
78	432.1	2063.87	-1.557	-0.069	2	0	0							0.178891	668.338							6.79785	25396.8							0	0
77.5
77	432.4	2053.87	-1.53	-0.003	4	0	0							0.257732	1203.01							12.1134	56541.4							0	0
76.5
76	432.7	2047.87	-1.014	-0.507	2	0	0							1.30435	6015.04							4.78261	22055.1							0	0
75.5
75	433	2043.87	-0.913	-0.177	2	0	0							1.82768	10526.3							4.96084	28571.4							0	0
74.5
74	433.3	2032.87	-1.189	-0.371	4	0	0	1						0.931677	3280.93							14.5963	51401.2							0	0
73.5
73	433.6	2018.87	-0.735	-0.24	2	0	0	1						0.470588	859.291							16.2353	29645.5							0	0
72.5
72	433.9	2007.87	-0.582	-0.484	4	0	0	1						0	0							6.76923	24060.2							0	0
71.5
71	434.2	1997.87	-0.308	-0.297	2	0	0	1						0.929368	3007.52							9.47955	30676.7							0	0
70.5
70	434.5	1986.87	-0.27	-0.656	2	0.416667	1093.64	1						0.625	1640.46							6.25	16404.6							0	0
69.5
69	434.8	1972.87	-0.653	-0.648	4	0.223714	859.291	1						0.223714	859.291							12.3043	47261							0	0
68.5
68	435.1	1960.87	-0.646	-0.599	2	0.419287	1002.51	1	425-500	2	1.24108	1.05298	1.45674	0.628931	1503.76							7.54717	18045.1							0	0
67.5
67	435.4	1948.87	-0.898	-0.013	2	0.449438	1002.51	1						0.224719	501.253							8.98876	20050.1							0	0
66.5
66	435.7	1937.87	-0.929	-0.688	2	0	0	1						1.3986	3280.93							4.4289	10389.6							0	0
65.5
65	436	1924.87	-0.733	-0.322	1	1.13269	1619.43	1						0.647249	925.39							5.66343	8097.17							0	0
64.5
64	436.3	1912.87	-0.61	-0.333	4	1.24224	4010.03	1	425-500	4	1.58838	1.46627	1.75657	1.24224	4010.03							2.17391	7017.54							0	0
63.5
63	436.6	1896.87	-0.225	-1.042	4	0.60423	1503.76	1						0.302115	751.88							3.02115	7518.8							0	0
62.5
62	436.9	1882.87	-0.751	-0.783	4	3.31633	11170.8	1	425-500	6	1.25025	1.14676	1.34462	0.765306	2577.87							0.510204	1718.58							0	0
61.5
61	437.2	1864.87	-0.689	-0.938	4	1.31579	2673.35	1						1.31579	2673.35							0.986842	2005.01							0	0
60.5
60	437.5	1859.87	-1.184	-0.469	4	2.21729	24060.2	1						0.443459	4812.03							4.21286	45714.3							0	0
59.5									425-500	7	1.04013	0.942167	1.13192
59	437.8	1797.88	-2.137	-0.661	2	2.00401	970.235	1						0	0	1		0				3.40681	1649.4							0	0
58.5
58	438.1	1735.88	-1.933	-0.505	4	1.21655	970.235	1						0.243309	194.047	1	180-212	1	6.2061	3.87598	7.85097	12.6521	10090.4							0	0
57.5									425-500	7	1.33201	1.23406	1.42279
57	438.4	1673.88	-1.657	-0.556	4	0.914634	1164.28	1						0.457317	582.14	1		0				11.8902	15135.6							0	0
56.5
56	438.7	1611.89	-1.393	-0.403	4	2.14133	1940.47	1	425-500	7	1.23144	1.13348	1.32154	1.2848	1164.28	1		0				6.63812	6015.45							0	0
55.5
55	439	1549.89	-1.422	-0.164	8	1.79104	2328.56	1						1.19403	1552.38	1		0				22.6866	29495.1							0	0
54.5									425-500	5	1.22595	1.10903	1.33674
54	439.3	1487.9	-1.027	-0.263	4	1.57658	1358.33	1						1.8018	1552.38	1						5.63063	4851.17							0	0
53.5																	180-212	3	9.24573	8.18052	10.0983
53	439.6	1425.9	-1.544	-0.415	8	1.07527	1552.38	1	425-500	14	1.30392	1.23647	1.36622	1.6129	2328.56	1						5.91398	8538.06							0	0
52.5
52	439.9	1363.91	-1.438	-0.205	4	1.50659	1552.38	1	425-500	7	1.30714	1.20918	1.39722	1.12994	1164.28	1						4.7081	4851.17							0	0
51.5
51	440.2	1301.91	-1.511	-0.13	8	3.25203	4657.13	1	425-500	11	1.29634	1.22029	1.37119	1.89702	2716.66	1						3.79404	5433.31							0	0
50.5																	180-212	4	6.00446	5.09502	6.76678
50	440.5	1239.91	-1.931	0.032	4	2.81124	2716.66	1	425-500	8	1.33757	1.24678	1.42536	1.60643	1552.38	1						4.41767	4269.03							0	0
49.5
49	440.8	1177.92	-1.351	-0.555	2	1.28205	485.117	1						2.30769	873.211	1						5.12821	1940.47							0	0
48.5									425-500	4	1.04574	0.923632	1.16317				180-212	2	9.88988	8.56566	10.94
48	441.1	1115.92	-1.268	-0.084	2	2.17391	970.235	1						2.17391	970.235	1						1.73913	776.188							0	0
47.5
47	441.4	1053.93	-1.2	-0.043	4, 2	1.45119	1067.26	1						6.59631	4851.17	1						3.43008	2522.61							0	0
46.5									425-500	7	1.46189	1.36393	1.55195				180-212	5	8.18751	7.38965	8.87827
46	441.7	991.931	-1.665	-0.099	8, 4	0.868307	1164.28	1						5.35456	7179.74	1						7.23589	9702.35		150-200	18	2.70489	2.40962	2.99373	0	0
45.5
45	442	929.936	-1.4202	0.077	4, 8	0.333333	388.094	1						9.16667	10672.6	1	180-212	3	9.23276	8.16755	10.0853	0.5	582.141							0	0
44.5
44	442.3	867.94	-1.333	0.035	4, 8	0	0	1						12.8284	16105.9	1	180-212	8	8.80748	8.14751	9.35907	1.23648	1552.37							0	0
43.5
43	442.6	805.944	-1.582	-0.302	4, 4	0.459418	582.141	1						13.6294	17270.2	1	180-212	1	9.52487	7.19475	11.1697	1.22511	1552.38							0	0
42.5																									150-200	14	3.45392	3.11885	6.57277
42	442.9	743.948	-1.246	0.339	4, 4	1.02916	1164.28	1						15.952	18046.4	1	180-212	20	8.08042	7.69501	8.46508	2.5729	2910.7							0	0
41.5									425-500	3	1.52426	1.38287	1.6598
41	443.2	681.953	-1.19	0.05	2, 4	1.74263	1261.31	1						19.3029	13971.4	1						0.268097	194.047							0	0
40.5																	180-212	7	10.1748	9.4834	10.7676
40	443.5	619.957	-1.18703	0.11	4, 4	7.75862	5239.27	1	425-500	7	1.49448	1.39652	1.58455	22.4138	15135.7	1						0	0							0	0
39.5
39	443.8	557.961	-1.2156	-0.20364	1, 2	13.2143	3589.87	1	425-500	6	1.54369	1.44019	1.63858	12.1429	3298.8	1						0	0							0.178571	48.5117
38.5																	180-212	7	10.8363	10.1449	11.4291
38	444.1	495.966			1, 1	9.80392	242.559	1						13.7255	339.582	1						0	0							0	0	1
37.5
37	444.4	433.97	-0.848833	-0.64555	1, 1	10.5455	1406.84	1	425-500	4	1.62776	1.50565	1.74529	4.72727	630.653	1		0				1.09091	145.535							0	0	1
36.5
36	444.7	371.974	-1.34665	-0.103	2, 2	19.4872	11060.7	2	425-500	14	1.529	1.46155	1.5913	9.05983	5142.24	1	180-212	3	7.25976	6.19456	8.11232	0	0	1						0	0	1
35.5
35	445	309.979	-1.309	-0.297	4, 8	22.5379	23091.6	4	425-500	22	1.57796	1.52337	1.62734	14.2045	14553.5	1	180-212	20	11.4327	11.0473	11.8174	0	0	1						0	0	1
34.5
34	445.3	247.983	-0.702	-0.094	4, 4	11.0169	12613.1	4	425-500	5	1.53828	1.42136	1.64976	13.0508	14941.6	1	180-212	6	9.85225	9.15546	10.4938	0	0	1						0	0	1
33.5
33	445.6	185.987	-1.549	0.567	4, 4	12.6386	11060.7	2	425-500	11	1.86522	1.78917	1.94771	11.7517	10284.5	1	180-212	10	10.4108	9.8611	10.9201	0	0	1						0	0	1
32.5
32	445.9	123.991	-1.086	-0.131	2, 4	15.5803	9508.28	2	425-500	10	2.00491	1.92772	2.83675	22.0986	13486.2	1	180-212	20	10.1322	9.74682	10.5169	0	0	1						0	0	1
31.5
31	446.2	61.9957	-1.403	-0.05	2, 4	15.444	7761.88	2	425-500	15	1.82557	1.76047	1.89625	20.8494	10478.5	1						0	0	1						0.19305	97.0235	1
30.5																	180-212	13	10.3657	9.88622	10.7885
30	446.5	0			4, 4	6.56566	5045.22	1	425-500	10	2.08926	2.01207	2.16471	27.2727	20957.1	1						0	0	1						2.52525	1940.47	1
29.5
29	446.8	-61.9957	0.506	0.603	4, 4	2.40741	2522.61	1	425-500	3	2.37384	2.23245	2.59376	8.7037	9120.21	1	180-212	20	11.3619	10.9765	11.7466	2.77778	2910.7	1	150-200	18	6.36875	6.07347	6.65759	11.6667	12225	1	150-200	15	1.14585	1.05575	1.24065
28.5
28	447.1	-123.991	0.186	0.513	8, 4	1.74588	3492.84	1						4.07371	8149.97	1						3.49176	6985.69	1	150-200	50	7.21225	7.02747	7.3881	13.3851	26778.5	1	150-200	15	1.08859	0.99849	1.18339
27.5									425-500	6	2.41261	2.30912	2.56983				180-212	9	11.3551	10.7664	11.9007
27	447.4	-185.987	-0.202	1.081	4, 4	1.38889	1552.38	1						3.125	3492.84	1						2.95139	3298.8	1	150-200	29	7.48922	7.25581	7.72328	14.4097	16105.9	1	150-200	18	1.1286	1.0499	1.2136
26.5
26	447.7	-247.983	0.05804	0.63892	4, 2	1.88679	1067.26	1						1.02916	582.141	1						2.74443	1552.38	1	150-200	22	6.50047	6.23198	6.77054	10.2916	5821.41	1	150-200	12	1.29884	1.20204	1.40614
25.5																	180-212	3	11.7915	10.7263	12.6441
25	448	-309.979	0.137	0.757	4, 2	0.811359	388.094	1						1.41988	679.164	1						4.46247	2134.52	1	150-200	19	6.87788	6.58522	7.17506	7.50507	3589.87	1	150-200	4	1.49739	1.33859	1.69439
24.5
24	448.3	-371.974	-0.355	0.6864	8, 4	1.21029	1552.38	1	425-500	2	2.09706	1.90895	2.26165	0.302572	388.094	1	180-212	1	8.33006	5.99994	9.97494	2.72315	3492.84	1	150-200	37	7.047	6.83706	7.25306	9.53101	12225	1	150-200	16	1.11587	1.03237	1.20787
23.5
23	448.6	-433.97	0.467	0.876	4, 2	0.536913	388.094	1						0.402685	291.07	1		0				3.48993	2522.61	1	150-200	21	7.43161	7.17544	7.69993	9.5302	6888.67	1	150-200	12	1.39517	1.29837	1.50247
22.5
22	448.9	-495.966			4, 4	1.30354	1358.33	1						0	0							5.40037	5627.36	1	150-200	21	7.11948	6.86331	7.3878	11.7318	12225	1	150-200	17	1.09437	1.00997	1.18687
21.5
21	449.2	-557.961	0.26	1.117	4, 4	1.92678	1940.47	1						0.192678	194.047							3.27553	3298.8	1	150-200	33	7.73754	7.51943	7.9692	12.7168	12807.1	1	150-200	26	1.20443	1.13833	1.27623
20.5
20	449.5	-619.957	-0.00548	0.66496	4, 2	2.65625	1649.4	1						0	0							5.3125	3298.79	1	150-200	15	6.95373	6.61758	7.25943	12.5	7761.86	1	150-200	15	1.3755	1.2854	1.4703
19.5									425-500	6	2.92286	2.81937	3.17234
19	449.8	-681.953	-0.051	0.996	4, 4	1.99501	1552.38	1						0.249377	194.047							3.99002	3104.75	1	150-200	25	7.67894	7.41675	7.91565	13.4663	10478.5	1	150-200	21	1.54617	1.47267	1.62417
18.5
18	450.1	-743.948	0.407	1.035	4, 2	1.95531	1358.33	1						0	0							5.02793	3492.84	1	150-200	22	7.26098	6.99249	7.53105	13.5475	9411.28	1	150-200	19	1.49047	1.41427	1.57757
17.5									425-500	6	1.96217	1.85868	2.56539
17	450.4	-805.944	-0.432	0.806	8, 4	2.54403	2522.61	1						0	0							3.13112	3104.75	1	150-200	38	7.35057	7.13969	7.55744	11.3503	11254.7	1	150-200	31	1.42671	1.36541	1.49531
16.5
16	450.7	-867.94			4, 2	3.13837	2134.52	1						0	0							2.85307	1940.47	1	150-200	32	7.44549	7.21795	7.66984	15.1213	10284.5	1	150-200	19	1.50312	1.42692	1.59022
15.5									425-500	4	1.85615	1.73404	1.97342
15	451	-929.936	0.127	0.342	4, 2	1.81543	1164.28	1						0	0							3.63086	2328.56	1	150-200	25	7.8736	7.61142	8.11031	13.0106	8344.02	1	150-200	12	1.61151	1.51471	1.71881
14.5
14	451.3	-991.931	0.323	0.758	4, 2	3.23077	2037.49	1						0	0							2.46154	1552.38	1	150-200	21	7.9383	7.68213	8.20662	11.0769	6985.69	1	150-200	11	1.63679	1.53929	1.74679
13.5
13	451.6	-1053.93	0.443	0.722	4, 2	4.06905	3201.77	1	425-500	2	2.44901	2.26091	2.61364	0	0							2.836	2231.54	1	150-200	25	7.69169	7.42951	7.9284	13.1936	10381.5	1	150-200	24	1.50348	1.43538	1.57658
12.5
12	451.9	-1115.92	0.464	0.598	4, 2	1.93966	873.211	1						0	0							1.93966	873.211	1	150-200	8	6.08891	5.65576	6.52328	13.3621	6015.45	1	150-200	10	1.6872	1.5853	1.8014
11.5									425-500	3	2.31198	2.17059	2.44752
11	452.2	-1177.92	0.024	0.659	2, 2	2.94659	1552.38	1						0	0							3.49908	1843.45	1	150-200	11	8.52308	8.1425	8.91072	12.523	6597.6	1	150-200	11	1.58224	1.48474	1.69224
10.5
10	452.5	-1239.91	1.293	1.076	4, 2	2.10325	1067.26	1						0	0							4.97132	2522.61	1	150-200	24	6.80989	6.55177	7.07461	13.9579	7082.71	1	150-200	14	1.26002	1.17482	1.36162
9.5									425-500	4	2.59266	2.47055	2.79933
9	452.8	-1301.91	0.475	0.803	4, 2	2.04461	1067.26	1						0	0							3.34572	1746.42	1	150-200	18	7.12941	6.83414	7.41825	12.8253	6694.62	1	150-200	23	1.4381	1.3687	1.5121
8.5
8	453.1	-1363.91	0.14	1.078	4, 2	2.38095	1649.4	1						0	0							1.68067	1164.28	1	150-200	16	7.10881	6.78712	7.42406	12.465	8635.07	1	150-200	28	1.51425	1.45145	1.58105
7.5									425-500	5	1.9862	1.86928	2.96995
7	453.4	-1425.9	0.631	0.999	8, 2	1.52193	1649.4	1						0	0							5.01343	5433.31	1	150-200	44	6.8564	6.66495	7.0473	12.0859	13098.2	1	150-200	19	1.4635	1.3873	1.5506
6.5
6	453.7	-1487.9	0.579	0.953	4, 2	0.826446	873.211	1						0	0							4.22406	4463.08	1	150-200	44	7.4822	7.29075	7.6731	9.18274	9702.35	1	150-200	20	1.18423	1.10763	1.26563
5.5
5	454	-1549.89	0.834	0.99	4, 2	0.640205	485.117	1						0	0							4.60948	3492.84	1	150-200	29	7.58069	7.34727	7.81475	9.34699	7082.71	1	150-200	7	1.2273	1.1038	1.3739
4.5
4	454.3	-1611.89	0.772	1.047	4, 2	0.421053	388.094	1						0	0							3.47368	3201.77	1	150-200	29	8.01077	7.77736	8.24483	10	9217.23	1	150-200	16	1.07242	0.988922	1.16442
3.5
3	454.6	-1673.88	0.441	1.102	4, 2	0.809249	679.164	1	425-500	2	2.58607	2.39797	2.75663	0.231214	194.047							3.46821	2910.7	1	150-200	26	7.42523	7.16983	7.66294	9.36416	7858.9	1	150-200	8	1.20202	1.08682	1.33332
2.5
2	454.9	-1735.88	0.408	0.909	2, 2	0.833333	485.117	1						0	0							6.16667	3589.87	1	150-200	29	7.41296	7.17955	7.64702	12	6985.69	1	150-200	13	1.43894	1.34744	1.54444
1.5
1	455.2	-1797.88	0.782	0.87	4, 2	0.445931	388.094	1						0	0							3.34448	2910.7	1	150-200	12	8.41838	8.06376	8.76177	8.47269	7373.78	1	150-200	6	1.27518	1.14218	1.43868
