# Supplementary material for: Calcification intensity in planktonic Foraminifera reflects ambient conditions irrespective of environmental stress
Source: Copernicus journal article supplement (doi:10.5194/bg-10-6639-2013), 2013-10-23
Supplement: Supplementary file 2 [file TableS2.xls]

## Sheet: Tabelle1
Authors:	Weinkauf, M. F. G., Moller, T., Koch, M. C., Kučera, M.
Publication:	Calcification intensity in planktonic Foraminifera reflects ambient conditions irrespective of environmental stress; Biogeosciences
Material:	Onset of Sapropel S5 in core M51-3/SL104, Eastern Mediterranean Sea (Pliny Trench)
Data:	Size and weight measurements, including area density, of specimens of Orbulina universa in four selected depths.
Parameters:
	Name	Short name		Unit		Comment
	Sample	Sample
	Depth	Depth		cm below coretop
	Specimen	Specimen in sample				Running integer
	Size	Size of specimen		μm2		Shell size as cross sectional area
	Weight	Weight of specimen		mg
	AD	Area density		1e-4 μg/μm2
Sample	Depth	Specimen	Size	Weight	AD
17	450.4	1	177151	0.0380767	2.14939
17	450.4	2	158593	0.02836	1.78822
18	450.1	1	186159	0.0415767	2.2334
18	450.1	2		0.0307433
18	450.1	3	171886	0.0354433	2.06202
27	447.4	1	169111	0.0383267	2.26637
27	447.4	2	166474	0.0456767	2.74377
27	447.4	3	184559	0.0465	2.51952
28	447.1	1	130818	0.0262033	2.00303
28	447.1	2	171624	0.04057	2.36389
28	447.1	3	160067	0.0373367	2.33256
32	445.9	1	165272	0.03475	2.10259
32	445.9	2	202721	0.04335	2.13841
32	445.9	3	160564	0.0352667	2.19642
32	445.9	4	186481	0.0317333	1.70169
32	445.9	5	155456	0.0246833	1.5878
32	445.9	6	151579	0.03115	2.05503
32	445.9	7	157415	0.02775	1.76285
32	445.9	8	169070	0.0291667	1.72512
32	445.9	9	186471	0.04455	2.38911
32	445.9	10	162241	0.0300667	1.85321
53	439.6	1	161674	0.01547	0.956866
53	439.6	2	175115	0.0268533	1.53347
53	439.6	3	195711	0.0268567	1.37226
53	439.6	4	175226	0.02613	1.49122
53	439.6	5	189873	0.0289967	1.52716
53	439.6	6	194377	0.0155133	0.798104
53	439.6	7	189949	0.01828	0.962362
53	439.6	8	187533	0.0237467	1.26626
53	439.6	9	160539	0.0184967	1.15216
53	439.6	10	185597	0.0267133	1.43932
53	439.6	11	161769	0.0218633	1.35152
53	439.6	12	190224	0.0260133	1.36751
53	439.6	13	192133	0.0266967	1.38949
